# Supplementary material for: Characterization of the Drosophila BEAF-32A and BEAF-32B Insulator Proteins
Source: PubMed Central journal article supplement (PMC5021357; doi:10.1371/journal.pone.0162906), 2016-09-13
Supplement: pone.0162906.s002.pdf [file pone.0162906.s002.pdf]

D.mel-32B 61 VLSPVQQRPOARMIPPIIKK-DKTVRITKAKTLREPLRVAKPKIE--SNVANYLGEAGAL  
D.sec-32B 61 VLSPVQQRPOARMIPPIIKK-DKTVRITKAKTLREPLRVAKPKIE--SNVASYLGEAGAL  
D.sim-32B 61 VLSPVQQRPOARMIPPIIKK-DKTVRITKAKTLREPLRVAKPKIE--SNVASYLGEAGAL  
D.ere-32B 61 VLSPVQQRPOARMIPPIIKK-DKTVRITKAKTLREPLRVAKPKIE--SNVANYLGEAGAL  
D.san-32B 61 VLSPVQQRPOARMIPPIIKK-DKTVRITKAKTLREPLRVAKPKID--SNVASYLGEAGAL  
D.yak-32B 61 VLSPVQQRPOARMIPPIIKK-DKTVRITKAKTLREPLRVAKPKID--SNVASYLGEAGAL  
D.bia-32B 61 VLSPVQQRPOARMIPPIIKK-DKTVRITKAKTLREPLRVAKPKIE--TNVASYLGEAGAL  
D.eug-32B 61 VLSPVQQRPOARMIPPIIKK-EKTVRITKAKTLREPLRVAKPKIE--SNVASYLGEAGAL  
D.fic-32B 61 VLSPVQQRPOARMIPPIIKK-EKTVRITKAKTLREPLRVAKPKID--SSTANYLGEAGAL  
D.tak-32B 61 VLSPVQQRPOARMIPPIIKK-EKTVRITKAKTLREPLRVAKPKIE--SNVASYLGEAGAL  
D.ele-32B 61 VLSPVQQRTPTRMIPIIKK-EKTVRITKAKTLREPLRVAKPKID--SSVASYLGEAGAL  
D.rho-32B 61 VLSPVQQRTPSRIPPIIKK-EKTVRITKAKTLREPLRVAKPKIE--SGVASYLGEAGAL  
D.kik-32B 61 VLSPVQQRPRVPIPIIKK-EKTVRIKAKOLREPLRVAKPKID--VSG--SYVGETGAL  
D.ana-32B 61 VLSPVQQRPRVPIPIIKK-EKTVRIKAKOLREPLRVAKPKIE--PASGSGFIVATESGAL  
D.bip-32B 61 VLSPVQQRPRVPIPIIKK-EKTVRIKAKOLREPLRVAKPKIE--PNSGSGFIVATESGAL  
D.per-32B 61 VLVNPFVQSRQGRILPIIKK-EKTVRIKAKOLREPLRVAKPKIEROST--SFVAETGAL  
D.pse-32B 61 VLVNPFVQSRQGRILPIIKK-EKTVRIKAKOLREPLRVAKPKIEROST--SFVAETGAL  
D.vir-32B 61 VLVNPFVQSRQGRILPIIKK-EKTVRIKAKOLREPLRVAKPKID----VHASIA--GAL  
D.gri-32B 61 VLVNPFVQSRQGRILPIIKK-EKTVRIKAKOLREPLRVAKPKID----VHASIT--GAL  
D.moj-32B 61 VLVNPFVQSRQGRILPIIKK-EKTVRIKAKOLREPLRVAKPKID----VHASIS--GAL  
D.wil-32B 61 VLVNPFVQSRQGRILPIIKK-EKTVRIKAKOLREPLRVAKPKID----VHASIS--GAL  
\*:\*:\*:\*: \* : \*: \*\*:\* \*\* : : : \* : : : \* : \*

D.mel-32B 118 POKWEEYEONDEISEDIKDIIYSEDPLCYSPIHVMEDEGLDQPEKQVTVLTHSTSPAGG  
D.sec-32B 118 POKWEEYEONDEISEDIKDIIYSEDPLCYSPIHVMEDEGLDQPEKQVTVLTHSTSPAGG  
D.sim-32B 118 POKWEEYEONDEISEDIKDIIYSEDPLCYSPIHVMEDEGLDQPEKQVTVLTHSTSPAGG  
D.ere-32B 118 POKWEEYEONDEISEDIKDIIYSEDPLCYSPIHVMEDEGLDQPEKQVTVLTHSTSPAGG  
D.san-32B 118 POKWEEYEONDEISEDIKDIIYSEDPLCYSPIHVMEDEGLDQPEKQVTVLTHSTSPAGG  
D.yak-32B 118 POKWEEYEONDEISEDIKDIIYSEDPLCYSPIHVMEDEGLDQPEKQVTVLTHSTSPAGG  
D.bia-32B 118 POKWEEYEONDEISEDIKDIIYSEDPLCYSPIHVMEDEGLDQPEKQVTVLTHSTSPAGG  
D.eug-32B 118 POKWEEYEONDEISEDIKDIIYSEDPLCYSPIHVMEDEGLDQPEKQVTVLTHSTSPAGG  
D.fic-32B 118 POKWEEYEONDEISEDIKDIIYSEDPLCYSPIHVMEDEGLDQPEKQVTVLTHSTSPAGG  
D.tak-32B 118 POKWEEYEONDEISEDIKDIIYSEDPLCYSPIHVMEDEGLDQPEKQVTVLTHSTSPAGG  
D.ele-32B 118 POKWEEYEONDEISEDIKDIIYSEDPLCYSPIHVMEDEGLDQPEKQVTVLTHSTSPAGG  
D.rho-32B 118 POKWEEYEONDEISEDIKDIIYSEDPLCYSPIHVMEDEGLDQPEKQVTVLTHSTSPAGG  
D.kik-32B 116 POKWEEYEONDEISEDIKDIIYSEDPLCYSPIHVMEDEGLDQPEKQVTVLTHSTSPAGG  
D.ana-32B 119 POKWEEYEONDEISEDIKDIIYSEDPLCYSPIHVMEDEGLDQPEKQVTVLTHSTSPAGG  
D.bip-32B 119 POKWEEYEONDEISEDIKDIIYSEDPLCYSPIHVMEDEGLDQPEKQVTVLTHSTSPAGG  
D.per-32B 117 POKWEEYEONDEISEDIKDIIYSEDPLCYSPIHVMEDEGLDQPEKQVTVLTHSTSPAGG  
D.pse-32B 117 POKWEEYEONDEISEDIKDIIYSEDPLCYSPIHVMEDEGLDQPEKQVTVLTHSTSPAGG  
D.vir-32B 115 POKWEEYEONDEISEDIKDIIYSEDPLCYSPIHVMEDEGLDQPEKQVTVLTHSTSPAGG  
D.gri-32B 115 POKWEEYEONDEISEDIKDIIYSEDPLCYSPIHVMEDEGLDQPEKQVTVLTHSTSPAGG  
D.moj-32B 115 POKWEEYEONDEISEDIKDIIYSEDPLCYSPIHVMEDEGLDQPEKQVTVLTHSTSPAGG  
D.wil-32B 118 POKWEEYEONDEISEDIKDIIYSEDPLCYSPIHVMEDEGLDQPEKQVTVLTHSTSPAGG  
\*\*\*\*\*: \* : : \*\*\*\*\*.\*\*\*\*\*: \* : : :

AKQLKNNLETSIERLTAVSEQLSYII

D.mel-32B 177 SSRPIGVCS--GVQATVVASTSSSSSSAKQLKNNLETSIERLTAVSEQLSYIIQQNHE-E  
D.sec-32B 177 SSRAIGVCS--GVQATVVASTSSSSSSAKQLKNNLETSIERLTAVSEQLSYIIQQNHE-E  
D.sim-32B 177 SSRPIAVCS--GVQATVVASTSSSSSSAKQLKNNLETSIERLTAVSEQLSYIIQQNHE-E  
D.ere-32B 177 SSRPSAVCS--GAQATVVASTSSSNSAKQLKNNLETSIDRLTTVSEQLSYIIQQNHE-E  
D.san-32B 177 SSRPSAVCS--GVQATVVASTSSSNSAKQLKNNLETSIDRLTTVSEQLSYIIQQNHE-E  
D.yak-32B 177 SSRPSAVCS--GVQATVVASTSSSNSAKQLKNNLETSIDRLTTVSEQLSYIIQQNHE-E  
D.bia-32B 177 SSRPSAASG--VQATVVASTATMNSAKQLKNNLETSIDRLTTVSEQLSYIIQQNHE-E  
D.eug-32B 177 SSRPSAAQ--GQATVVASTSGSN--AAKQLKNNLETSIDRLTTVSEQLSYIIQQNHE-E  
D.fic-32B 177 GSSRPSAII--PVVQATVVLASTSNMNSAKQLKNNLETSIDRLTTVSEQLSYIIQQNHE-E  
D.tak-32B 178 GS-RQSAGG--STVQATVVASTSNMNSAKQLKNNLETSIDRLTTVSEQLSYIIQQNHE-E  
D.ele-32B 175 GSRANAAASQGIQATVVASTSNMNSAKQLKNNLETSIDRLTTVSEQLSYIIQQNHE-E  
D.rho-32B 178 SSSRTSTAGPQVVQATVVASTSANN--SAKQLKNNLETSIDRLTTVSEQLSYIIQQNHE-E  
D.kik-32B 173 GSRASATP----VVATVVASTSASSPAKQLKNNLETSIDRLTTVSEQLSYIIQQNHE-E  
D.ana-32B 179 ASVSAPVVAT-----VVAAPNSAKQLKNNLETSIDRLTTVSEQLSYIIQQNHE-E  
D.bip-32B 179 ASVSAPVVAT-----VVAAPNSAKQLKNNLETSIDRLTTVSEQLSYIIQQNHE-E  
D.per-32B 170 -GHSRATISSAPVVATVVASNNANANAAKQLKNNLETSIDRLTTVSEQLSYIIQQNHE-E  
D.pse-32B 170 -GHSRATISSAPVVATVVASNNANANAAKQLKNNLETSIDRLTTVSEQLSYIIQQNHE-E  
D.vir-32B 173 VVATVVSAP-----TSAAKTLKNNLETSIERLTAVSEQLSYIIQQNHE-E  
D.gri-32B 175 VVATVVSCT-----TSAAKTLKNNLETSIERLTAVSEQLSYIIQQNHE-E  
D.moj-32B 174 VVATVVSAP-----TSAAKTLKNNLETSIDRLTTVSEQLSYIIQQNHE-E  
D.wil-32B 177 SASASVTPMV-----TTMVSTSSNSAKSLKNNLETSIDRLTTVSEQLSYIIQQNHE-E

\*\*\* \*\*\*\*\* \*\*:\*\*\*:\*\*\*\*\* \*:\*\*\*:.. :

KDDDYFALSLVPAMRHLSLRKMYVRSKIQDILFKESED

D.mel-32B 234 LTKDDDYFALSLVPAMRHLSLRKMYVRSKIQDILFKESESDTLAKDE--  
D.sec-32B 234 LTKDDDYFALSLVPVMRHLSLRKMYVRSKIQDILFKESESDSPVAKDE--  
D.sim-32B 234 LTKDDDYFALSLVPVMRHLSLRKMYVRSKIQDILFKESESDSPVAKDE--  
D.ere-32B 234 LNKDDDYFALSLVPVMRHLSLRKMYVRSKIQEILFKESESDSAPAKDE--  
D.san-32B 234 HTKDDDYFALSLVPVMRHLSLRKMYVRSKIQEILFKESESDSLPAKDE--  
D.yak-32B 234 HTKDDDYFALSLVPVMRHLSLRKMYVRSKIQEILFKESESDSLPAKDE--  
D.bia-32B 234 ATKDDDYFALSLVPVMRHLSLRKMYVRSKIQEILFKESESDSVPSKDE--  
D.eug-32B 232 QTKDDDYFALSLVPVMRHLSLRKMYVRRAKIQEILFKESESDGAPTKDE--  
D.fic-32B 234 HTKDDDYFALSLVPVMRHLSLRKMYVRSKIQEILFKESESDSAPAKDE--  
D.tak-32B 234 HTKDDDYFALSLVPVMRQLSLNRKMYVRSKIQEILFKESESDSAPAKDE--  
D.ele-32B 234 QTKDDDYFALSLVPVMRHLSLRKMYVRSKIQEILFKESESDSTPAKDE--  
D.rho-32B 236 HTKDDDYFALSLVPVMRHLSLRKMYVRSKIQEILFKESESDSPVAKDE--  
D.kik-32B 228 QTKDDDYFALSLVPVMRHLSLRKMYVRSKIQEILFKESESDGESLASKDE--  
D.ana-32B 229 LSKDDDYFALSLVPVMRQLSLNRKMYVRSKIQEILFKESESDPIPSKED--  
D.bip-32B 229 LVKDDDYFALSLVPVMRQLSLNRKMYVRSMITHEILYKEAQPTPPASKEE  
D.per-32B 228 HSKDDDYFALSLVPSMRQLSLNRKMYVRRTKIQEVIKTSSEATSGKDE--  
D.pse-32B 228 HIKDDDYFALSLVPSMRQLSLNRKMYVRRTKIQEVIKTSSEATSGKDE--  
D.vir-32B 218 QTKDDDYFALSLVPVMRQLSLNRKMYVRSKIHEILYKESEETRTKTE---  
D.gri-32B 219 QTKDDDYFALSLVPVMRQLSLNRKMYVRSKIHEILYKESEETTTKTE---  
D.moj-32B 218 QIKDDDYFALSLVSSMRQLSLNRKMYVRRAKIQEVIKTSSEATSGKDE---  
D.wil-32B 230 HSKDDDYFALSLVPVMRQLSLNRKMYVRSKIQEILFKESEANPSTKQE--

\*\*\*\*\*:\*\*\*:\*\*\*\*. \*\*::\*..\*\*\*:\*\*\*: \* :::\* :

**C**

**BEAF-32A**

(only the unique 32A sequences plus 10 shared amino acids [DKTVRITKAK] are shown)

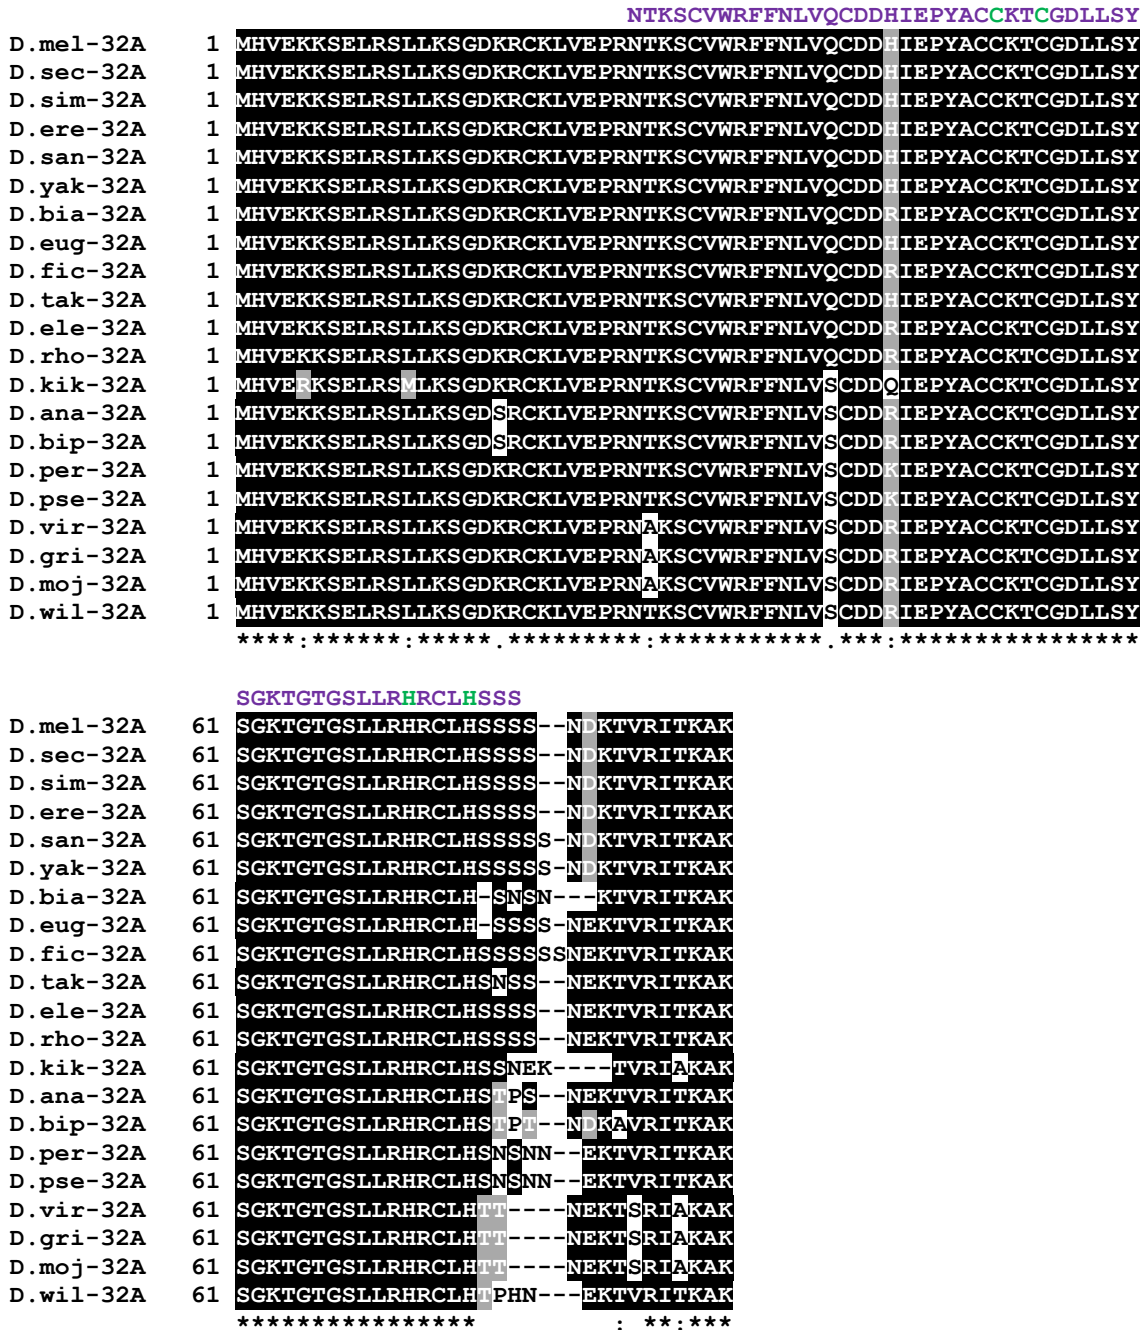

Supplemental Figure S2. Boxshade of BEAF protein sequences from 21 *Drosophila* species. A) Abbreviations and species used. Species are listed in approximate order of evolutionary distance from *D. melanogaster*. B) Boxshade for BEAF-32B. Shown above the boxshade are the BED C<sub>2</sub>H<sub>2</sub> zinc finger sequence (blue font with potential zinc-coordinating C and H in red); putative leucine zipper sequence (orange font) and BESS domain sequence (aqua font). C) Boxshade of the unique BEAF-32A sequence, plus 10 amino acids shared with BEAF-32B. Shown above the sequence is the BED C<sub>2</sub>H<sub>2</sub> zinc finger sequence (purple font with potential zinc-coordinating C and H in aqua).
